# Supplementary material for: Flies improve the salience of iridescent sexual signals by orienting toward the sun
Source: bioRxiv or medRxiv preprint supplement (doi:10.1101/2020.05.09.085639), 2020-05-10
Supplement: Supplementary file [file media-1.pdf]

**Supplementary material: White & Latty (2020) Flies improve the salience of iridescent sexual signals by orienting toward the sun**

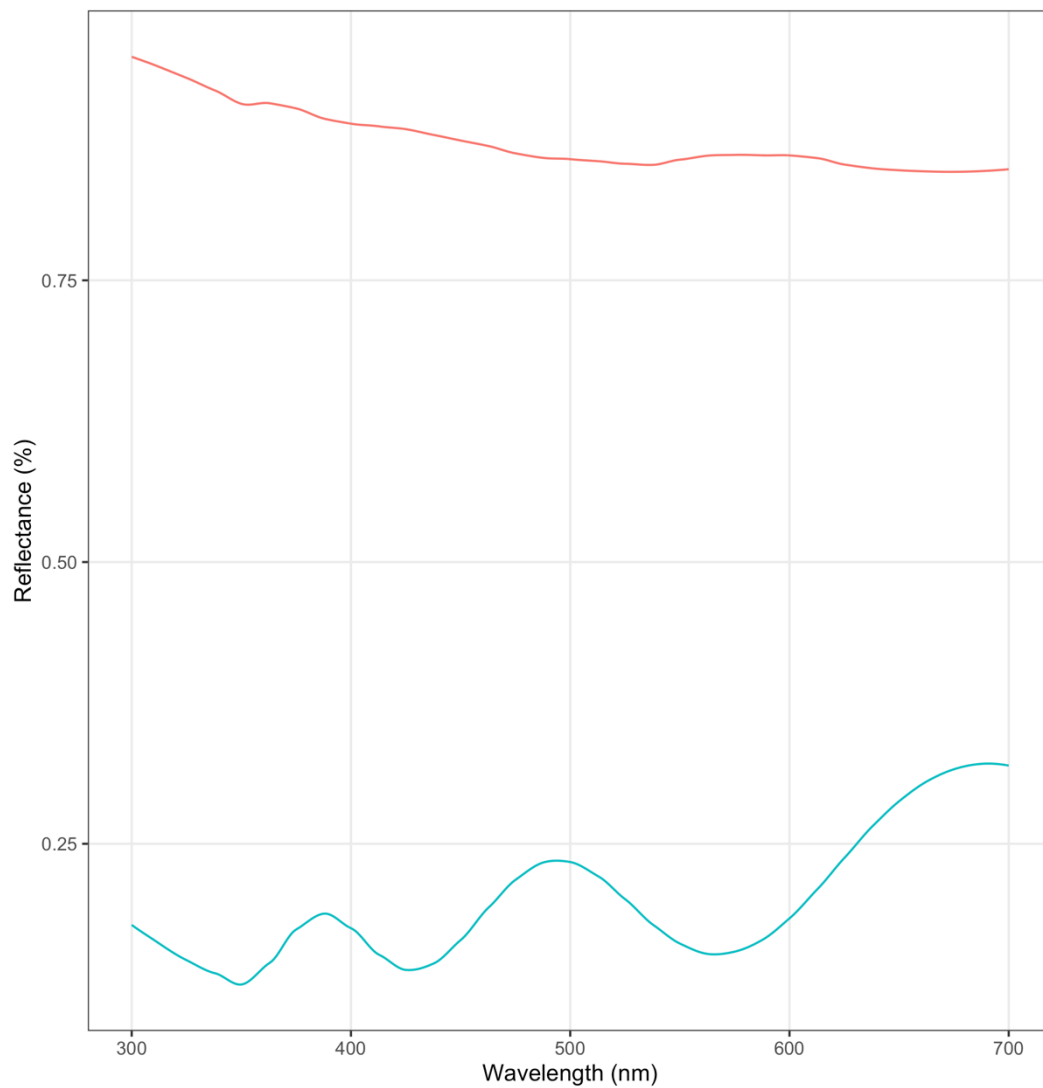

**Figure S1:** Normalised reflectance spectra of the structurally coloured faces (red) and wings (blue) of male *Lispe cana*.

**Table 1:** Diel summary environmental data during each condition. Measures are drawn from the Australian Bureau of Meteorology’s Wyong Bridge Upstream station, situation 9.8 km from the study site (accessible at <http://www.bom.gov.au/climate/data/>).

| Condition | Temperature (°C) |      |      |      | Solar exposure (MJ/m <sup>2</sup> ) |      |      |     | Rainfall (mm) |     |      |    |
|-----------|------------------|------|------|------|-------------------------------------|------|------|-----|---------------|-----|------|----|
|           | min              | max  | mean | sd   | min.                                | max  | mean | sd  | min.          | max | mean | sd |
| sun       | 19.8             | 33.3 | 27.3 | 5.2  | 18.9                                | 25.4 | 23.0 | 4.4 | 0             | 0   | 0    | 0  |
| cloud     | 17.0             | 23.3 | 19.5 | 2.7  | 10.9                                | 21.4 | 15.2 | 1.8 | 0             | 0   | 0    | 0  |
| sun-block | 32.7             | 34.3 | 33.2 | 0.77 | 25.2                                | 26.6 | 26.0 | 0.6 | 0             | 0   | 0    | 0  |
